# Supplementary material for: Carcinogenic Risk of Pb, Cd, Ni, and Cr and Critical Ecological Risk of Cd and Cu in Soil and Groundwater around the Municipal Solid Waste Open Dump in Central Thailand
Source: Hindawi journal article supplement (doi:10.1155/2022/3062215), 2022-01-01
Supplement: f1 [file 3062215.f1.pdf]

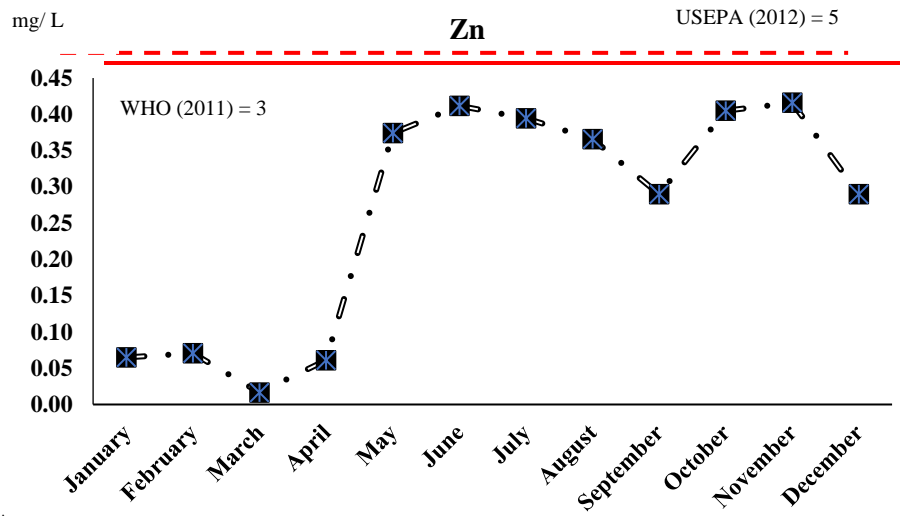

S1A

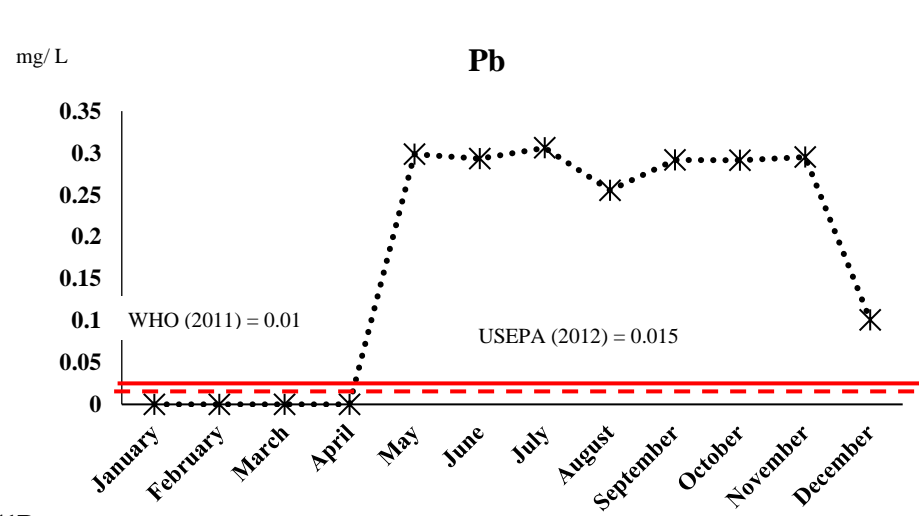

S1B

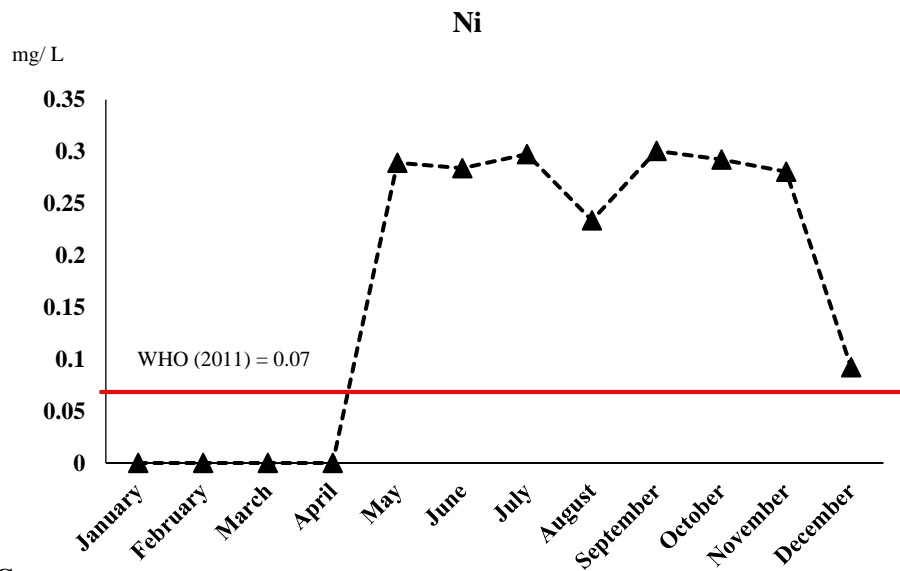

S1C

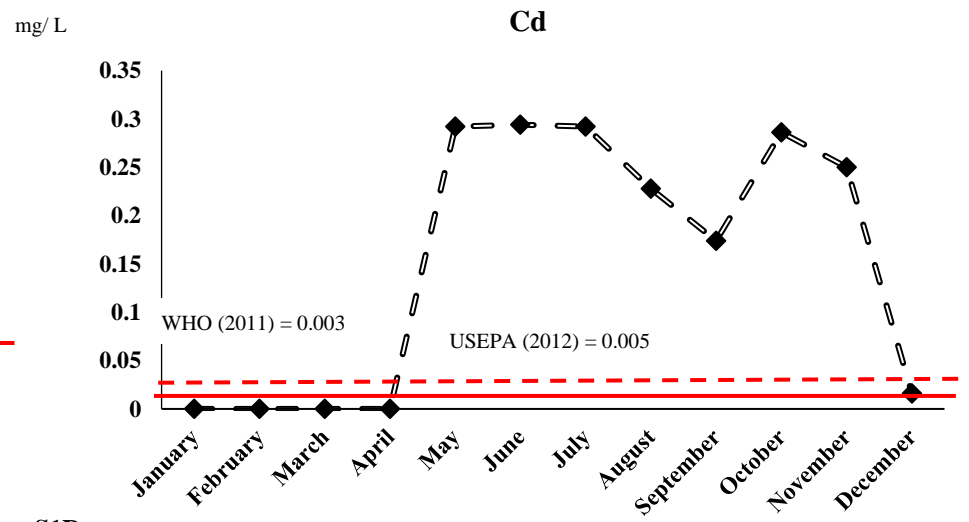

S1D

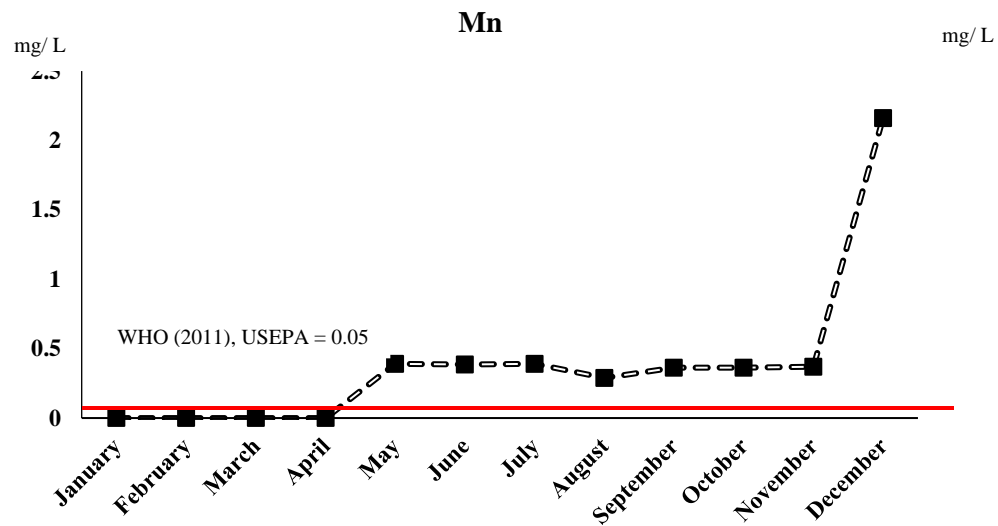

S1E

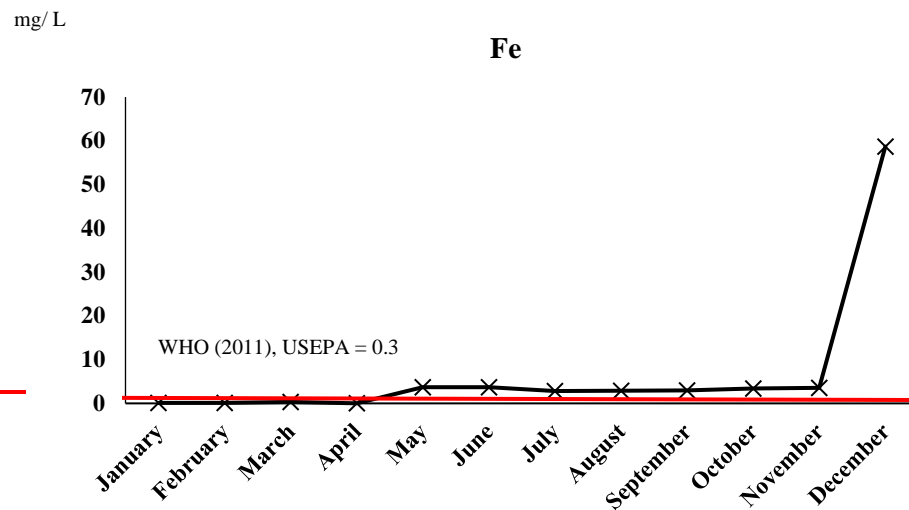

S1F

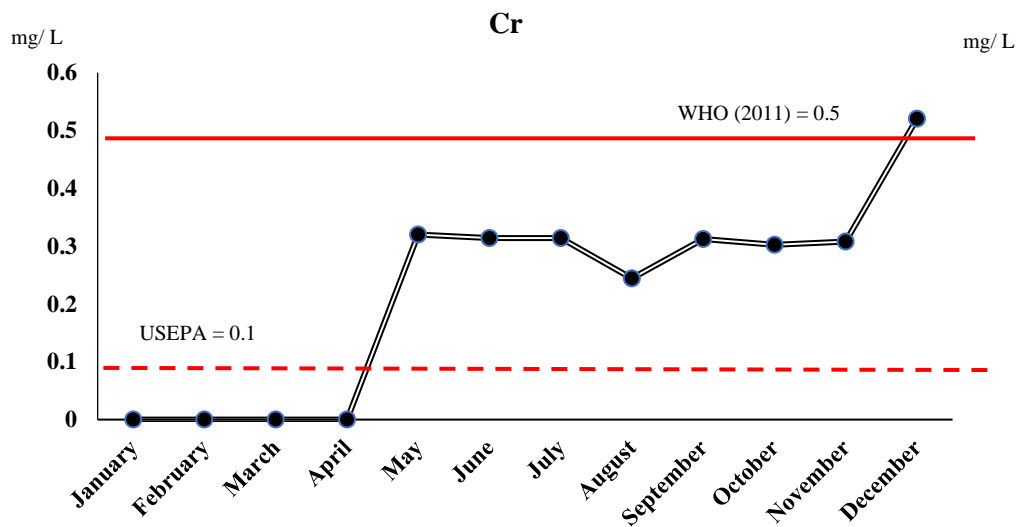

S1G

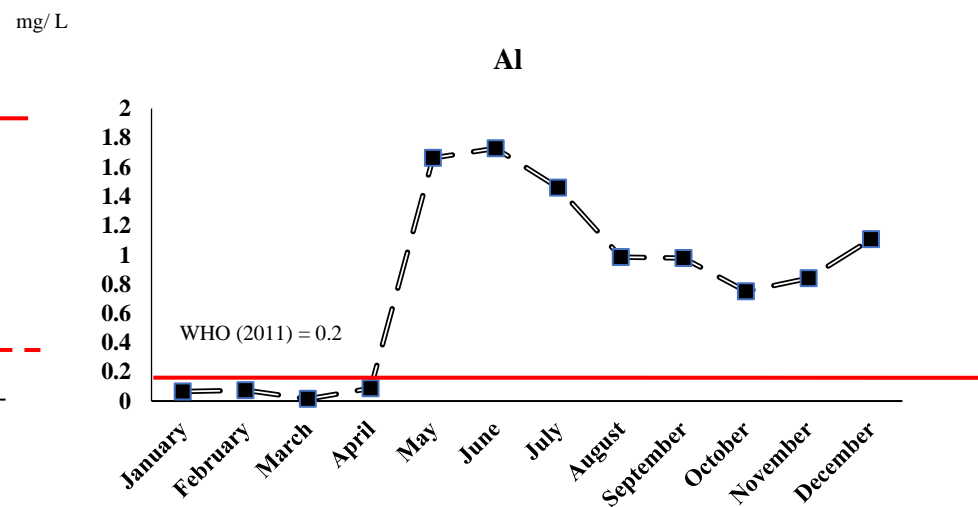

S1H

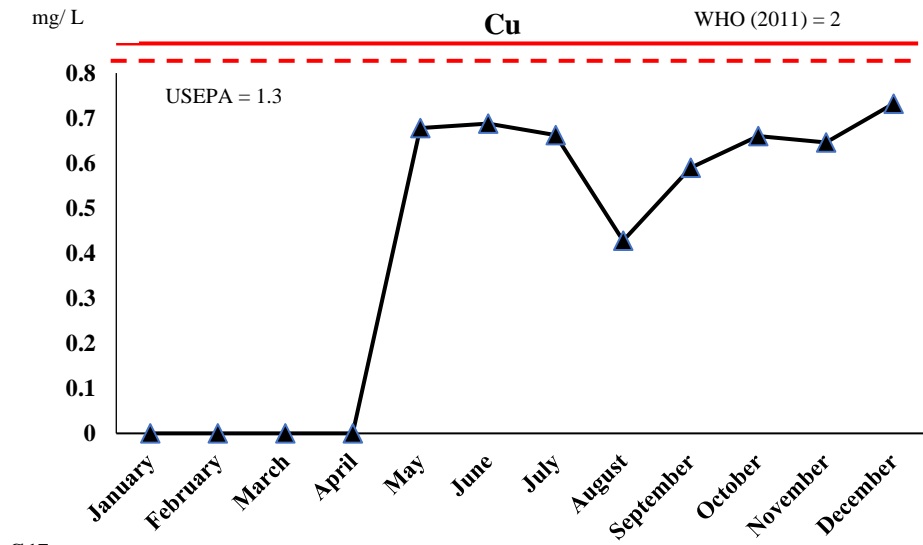

S11

**Supplementary figure S1** The levels of Zn, Pb, Ni, Cd, Mn, Fe, Cr, Al, and Cu determined in groundwater compared with the WHO and USEPA standard limits.

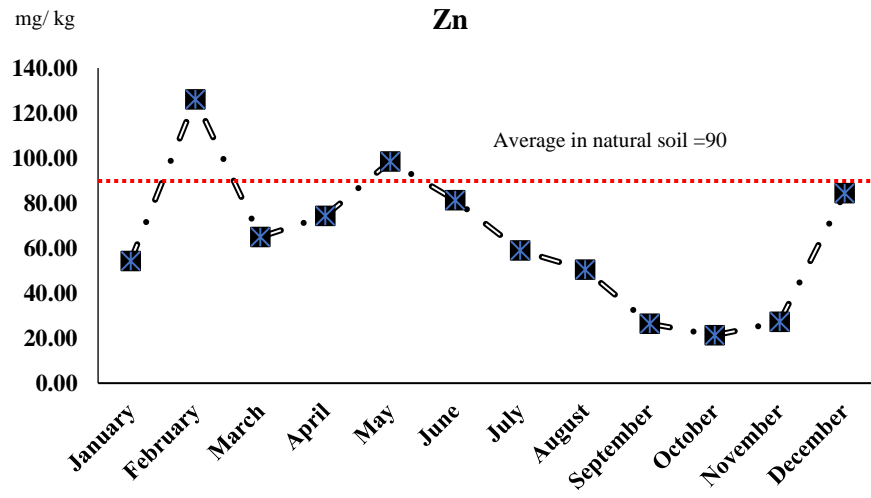

S2A

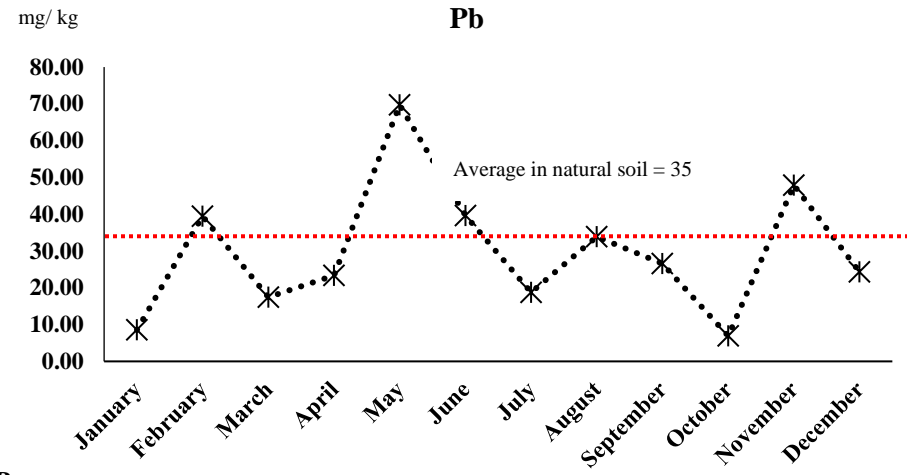

S2B

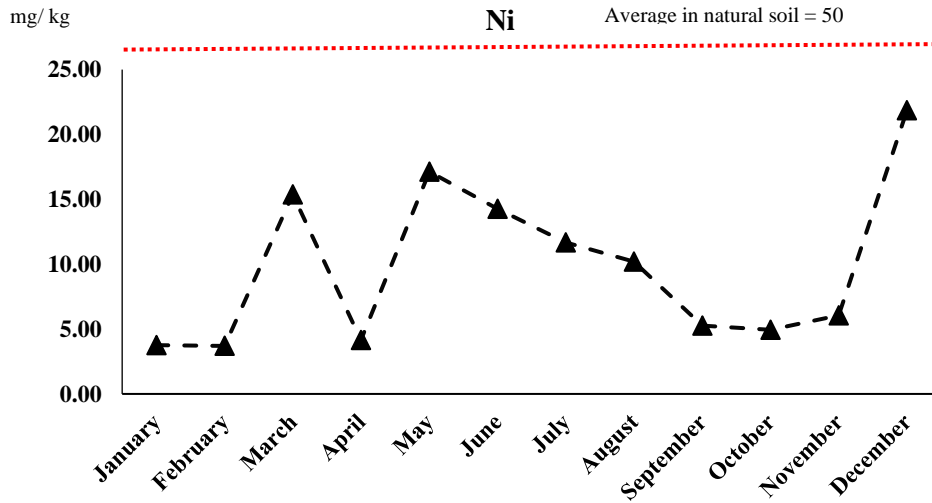

S2C

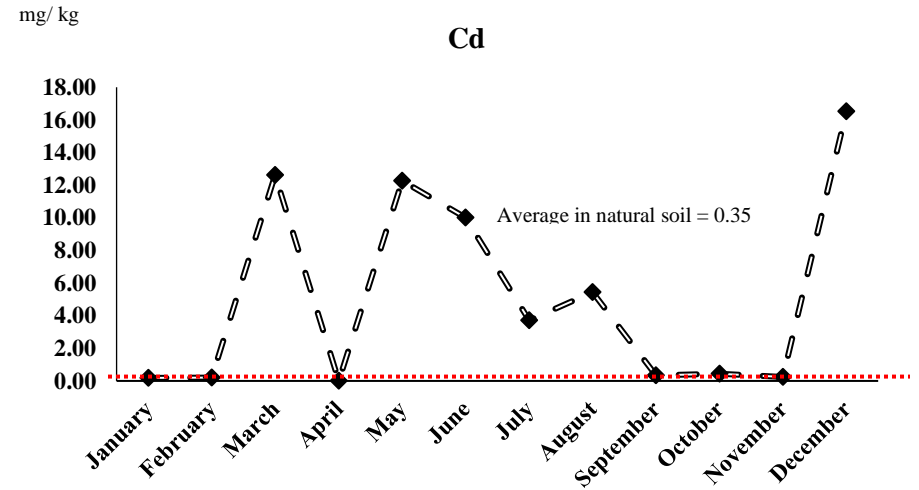

S2D

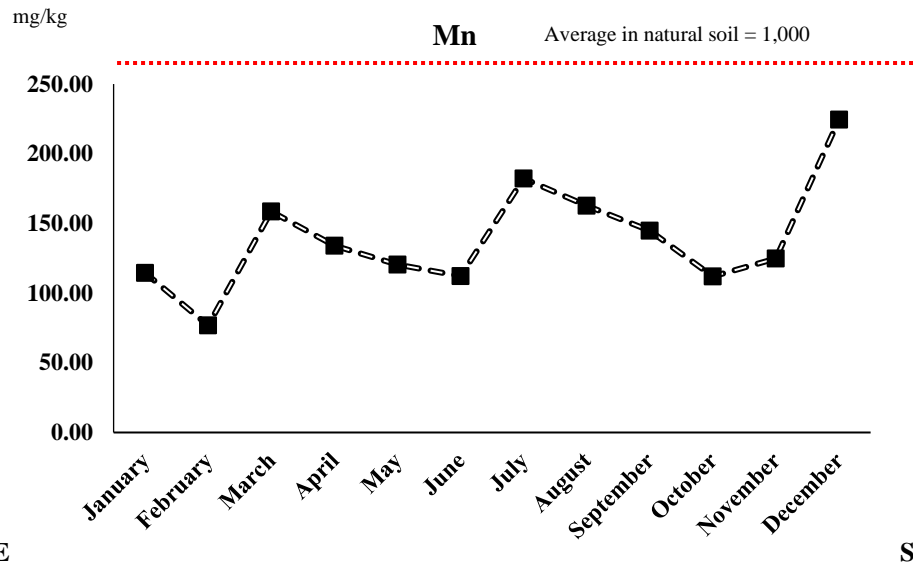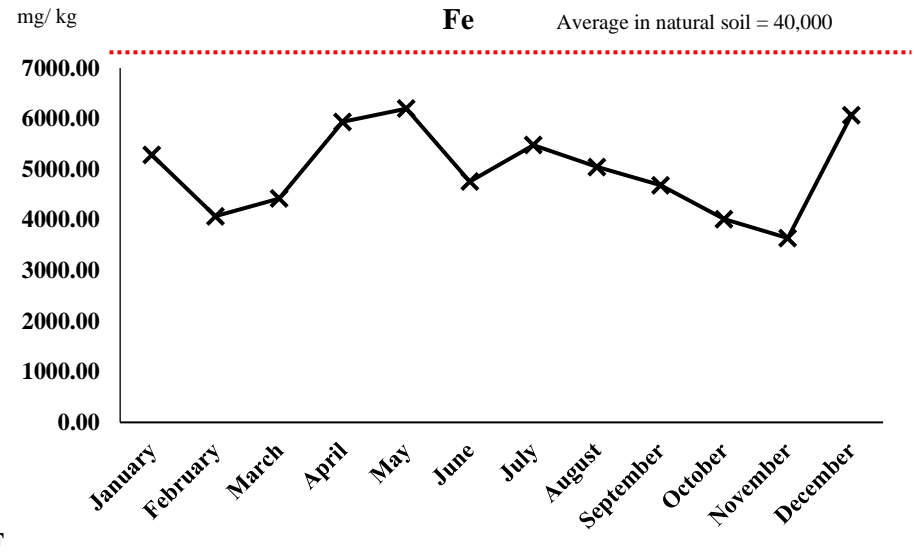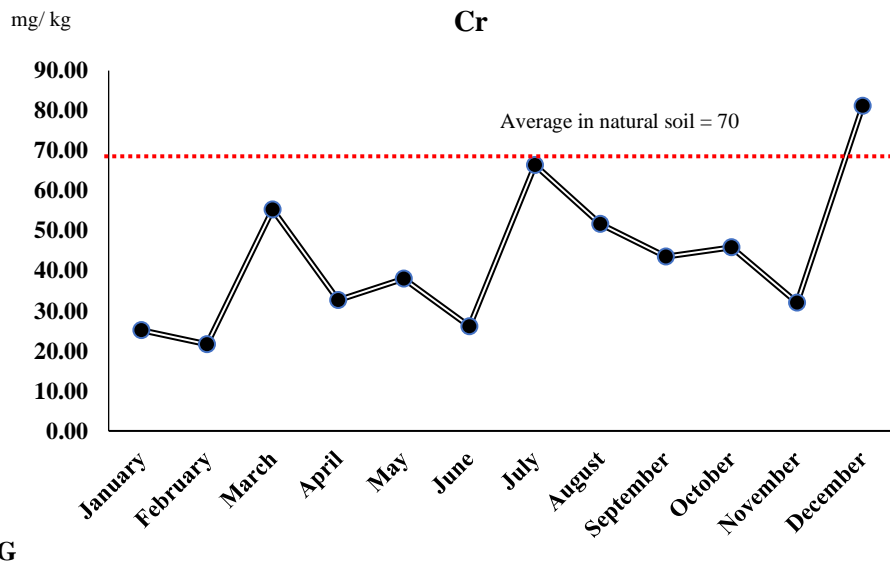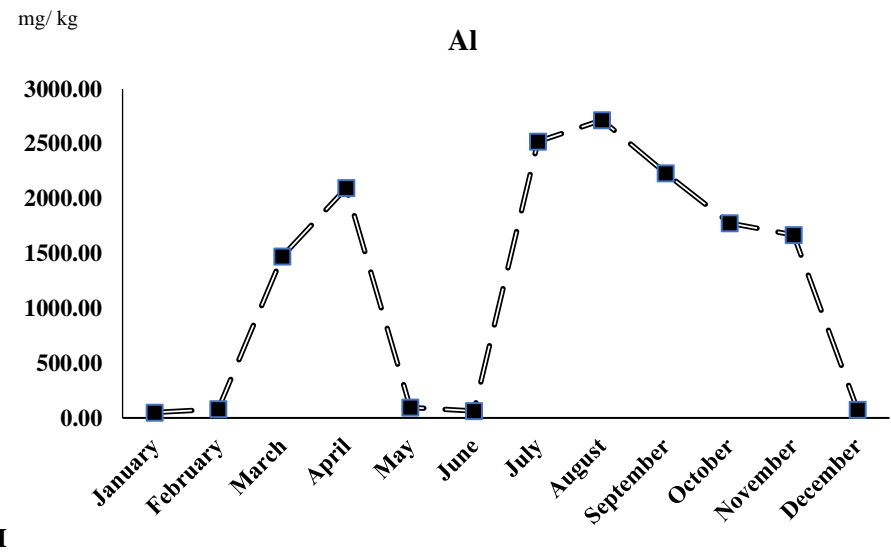

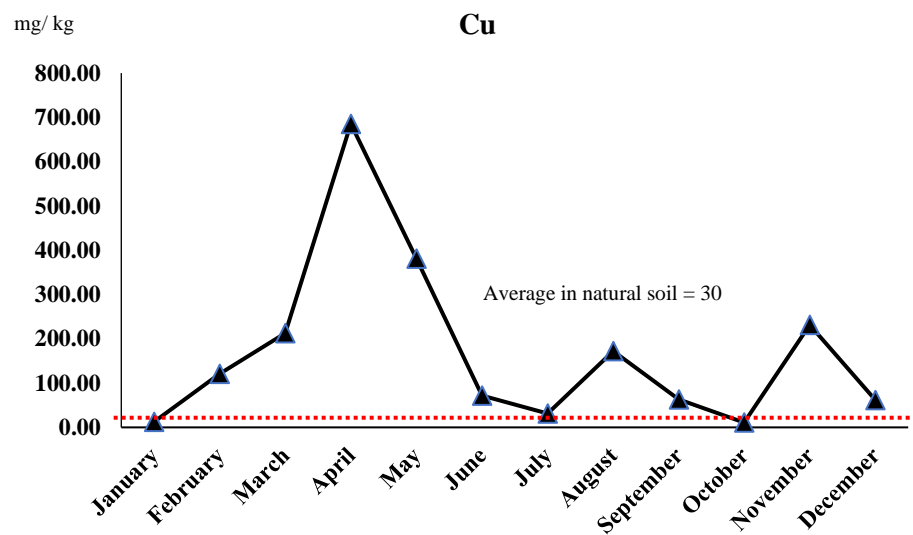

S2I

**Supplementary figure S2** The levels of Zn, Pb, Ni, Cd, Mn, Fe, Cr, Al, and Cu determined in the soil compared with natural soil standard limits

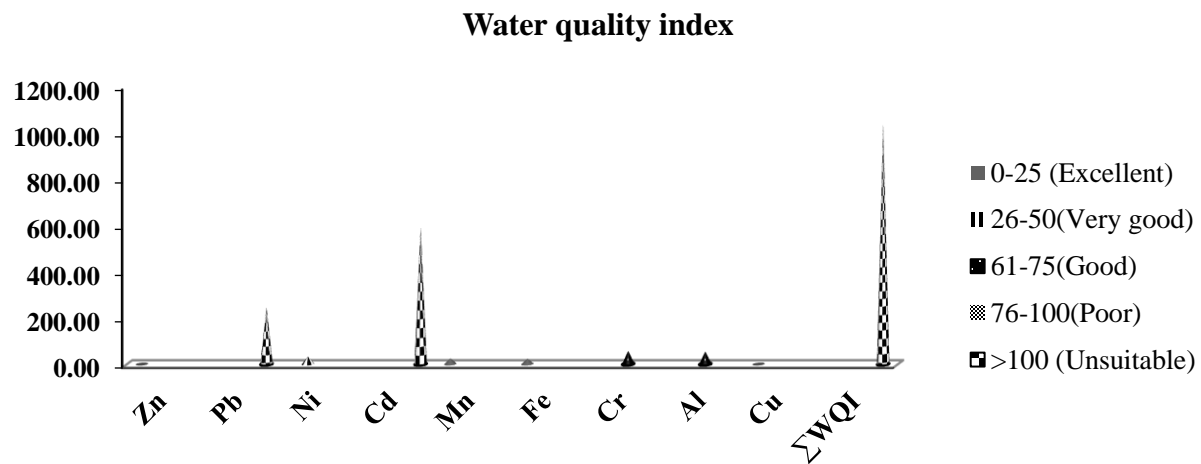

**Supplementary figure 3** The water quality index of Zn, Pb, Ni, Cd, Mn, Fe, Cr, Al, and Cu in the groundwater
